# Supplementary material for: Preparation of 1, 3, 6, 8-Pyrenesulfonic Acid Tetrasodium Salt Dye-Doped Silica Nanoparticles and Their Application in Water-Based Anti-Counterfeit Ink
Source: MDPI journal article supplement (doi:10.3390/ma13184074), 2020-09-14
Supplement: s1 [file s1]

Supplementary Materials

# Preparation of 1, 3, 6, 8-Pyrenesulfonic Acid Tetrasodium Salt Doped Silica Nanoparticles and Its Application in Water-based Anti-counterfeit Ink

Liyong Jiao <sup>1,2, \*</sup>, Mengnan Zhang <sup>2</sup> and Houbin Li <sup>1, \*</sup>

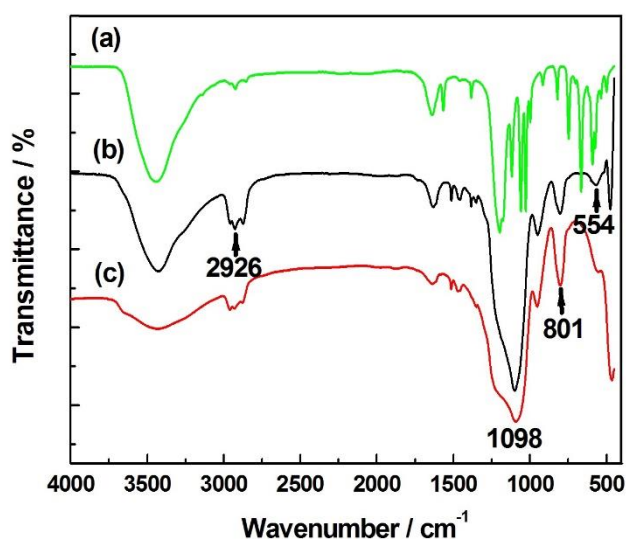

**Figure 1.** FT-IR spectra of (a) PTSA, (b) the product of PTSA-SiNPs prepared with PDADMAC, and (c) the product of PTSA-SiNPs prepared without PDADMAC.

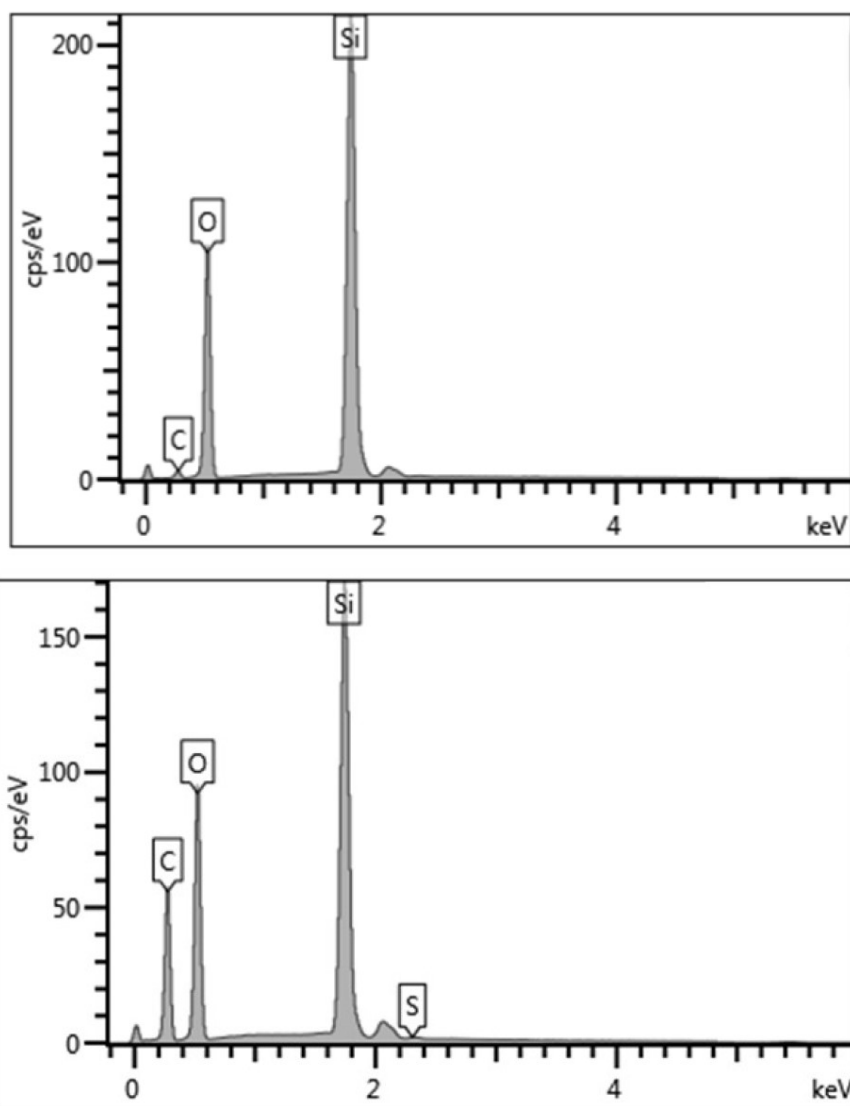

**Figure 2.** (a) EDS spectra of the product prepared by PTSA-SiNPs with PDADMAC (element mass distribution of PTSA-SiNPs is Si 13.32%, O 37.44%, C 49.54%, S 0.06%, respectively.); (b) EDS spectra of the product prepared by PTSA-SiNPs without PDADMAC (element mass distribution of PTSA-SiNPs is Si 34.60%, O 54.69%, C 10.72%, respectively.).
